# Supplementary material
Source: PubMed Central journal article supplement (PMC3645292)
Supplement: NIHMS399623-supplement-SF2.pdf [file NIHMS399623-supplement-SF2.pdf]

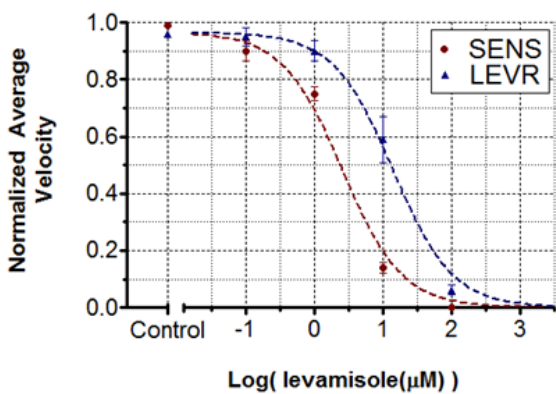

SENS: EC<sub>50</sub> = 3 μM || Log(EC<sub>50</sub>) = 0.41±.14 μM  
LEVR: EC<sub>50</sub> = 14 μM || Log(EC<sub>50</sub>) = 1.15±.09 μM

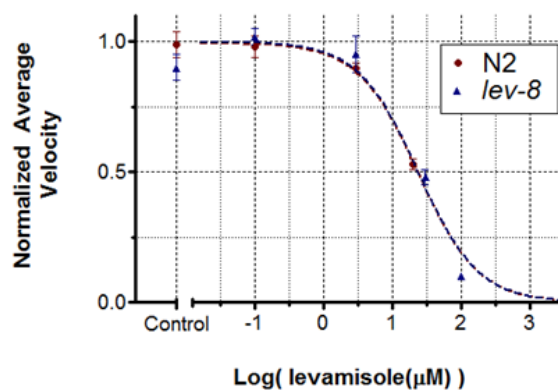

N2: EC<sub>50</sub> = 23 μM || Log(EC<sub>50</sub>) = 1.37±.04 μM  
lev-8: EC<sub>50</sub> = 24 μM || Log(EC<sub>50</sub>) = 1.38±.14 μM

**SF2** Normalized velocity data for *O. dentatum* (left) and *C. elegans* (right). These plots are provided to show our assay is advantageous as both pre- and post-exposure are monitored and, thus, normalized velocity can be monitored (i.e. output divided by input velocity), removing any day to day inconsistencies (e.g. temperature) from the experiments.
