# Supplementary material
Source: PubMed Central journal article supplement (PMC3645292)
Supplement: NIHMS399623-supplement-SF4.pdf [file NIHMS399623-supplement-SF4.pdf]

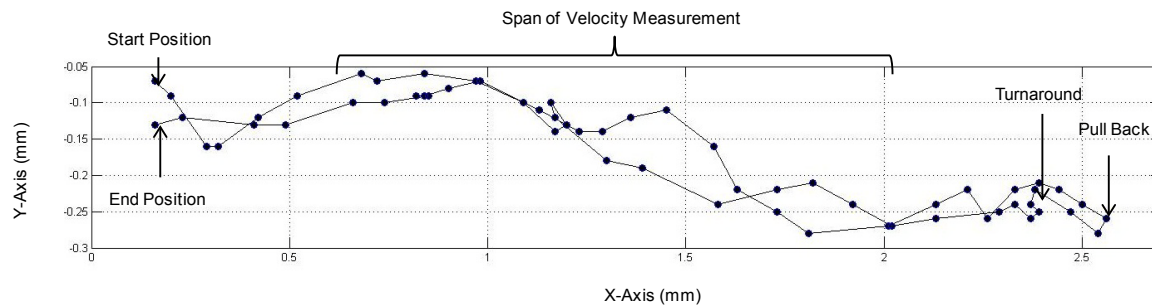

**SF4** Positions of a representative worm's centroid (x and y coordinates) in the microchannel are plotted. Initially, the worm is moving towards the right side in the presence of a 5 V/cm electric field (directed to the right). The field direction is then switched to the left side, which causes the worm to retract, turn around, and then continue moving towards the left.
